# Supplementary material
Source: PubMed Central journal article supplement (PMC5728644)
Supplement: ba012310-suppl1.pdf [file ba012310-suppl1.pdf]

**Soluble interleukin-2 receptor is a sensitive diagnostic test in adult HLH: Supplemental Data**

Anna Hayden, Molly Lin, Sujin Park, Morris Pudek, Marion Schneider, Michael B. Jordan, Andre Mattman, and Luke Y.C. Chen

**Table 1. Characteristics of Non- HLH patients (N = 40)**

| Disease              | No. patients |
|----------------------|--------------|
| Autoimmune disorder  | 8            |
| Sepsis               | 6            |
| Unknown              | 5            |
| Histiocyte disorder  | 4            |
| Lymphoma             | 3            |
| Acute hepatitis      | 3            |
| Acute leukemia       | 2            |
| Other malignancy     | 1            |
| IgG4 related disease | 1            |
| Myocarditis          | 1            |
| Hemolytic anemia     | 1            |
| TTP                  | 1            |
| Hb SC disease        | 1            |
| Immunodeficiency     | 1            |
| CAPS                 | 1            |
| Sarcoidosis          | 1            |
| No. HLH criteria     | No. patients |
| 7/7                  | 0            |
| 6/7                  | 1            |
| 5/7                  | 4            |
| 4/7                  | 5            |
| 3/7                  | 6            |
| 2/7                  | 10           |
| 1/7                  | 6            |
| 0/7                  | 8            |

**Table 2. Characteristics of HLH patients (N=38)**

| HLH subtype       |         | No. patients |
|-------------------|---------|--------------|
|                   | MAHS    | 16           |
|                   | IAHS    | 14           |
|                   | Unknown | 5            |
|                   | MAS     | 3            |
| No. HLH criteria* |         | No. patients |
|                   | 7/7     | 7            |
|                   | 6/7     | 8            |
|                   | 5/7     | 21           |
|                   | 4/7     | 1**          |
|                   | 3/7     | 1**          |
|                   | 2/7     | 0            |
|                   | 1/7     | 0            |
|                   | 0/7     | 0            |

MAHS – malignancy associated hemophagocytic syndrome, IAHS – infection associated hemophagocytic syndrome, MAS – macrophage activation syndrome

\*Because NK cell function is not available in our center most patients were evaluated on the basis of the seven available HLH 2004 criteria.

\*\*Two patients were deemed by their treating Hematologist to have HPS/HLH despite having fewer than 5/7 HLH 2004 criteria. The patient with 4/7 criteria, EH21, was deemed to have HPS/HLH after presenting with fever, severe hepatitis, ferritin 10466 µg/L, sIL-2r 3784 U/mL, HScore 218, hemophagocytosis and metastatic adenocarcinoma (lung origin) in bone marrow. The patient with 3/7 criteria, H61, had disseminated tuberculosis in the context of inflammatory bowel disease, with hepatitis, ferritin 10466 µg/L, sIL-2r 3784 U/mL, HScore 200, which improved with steroids, IVIg and treatment of the tuberculosis.

**Figure 1. Trends of sIL-2r and ferritin for HLH patients with multiple Measurements**

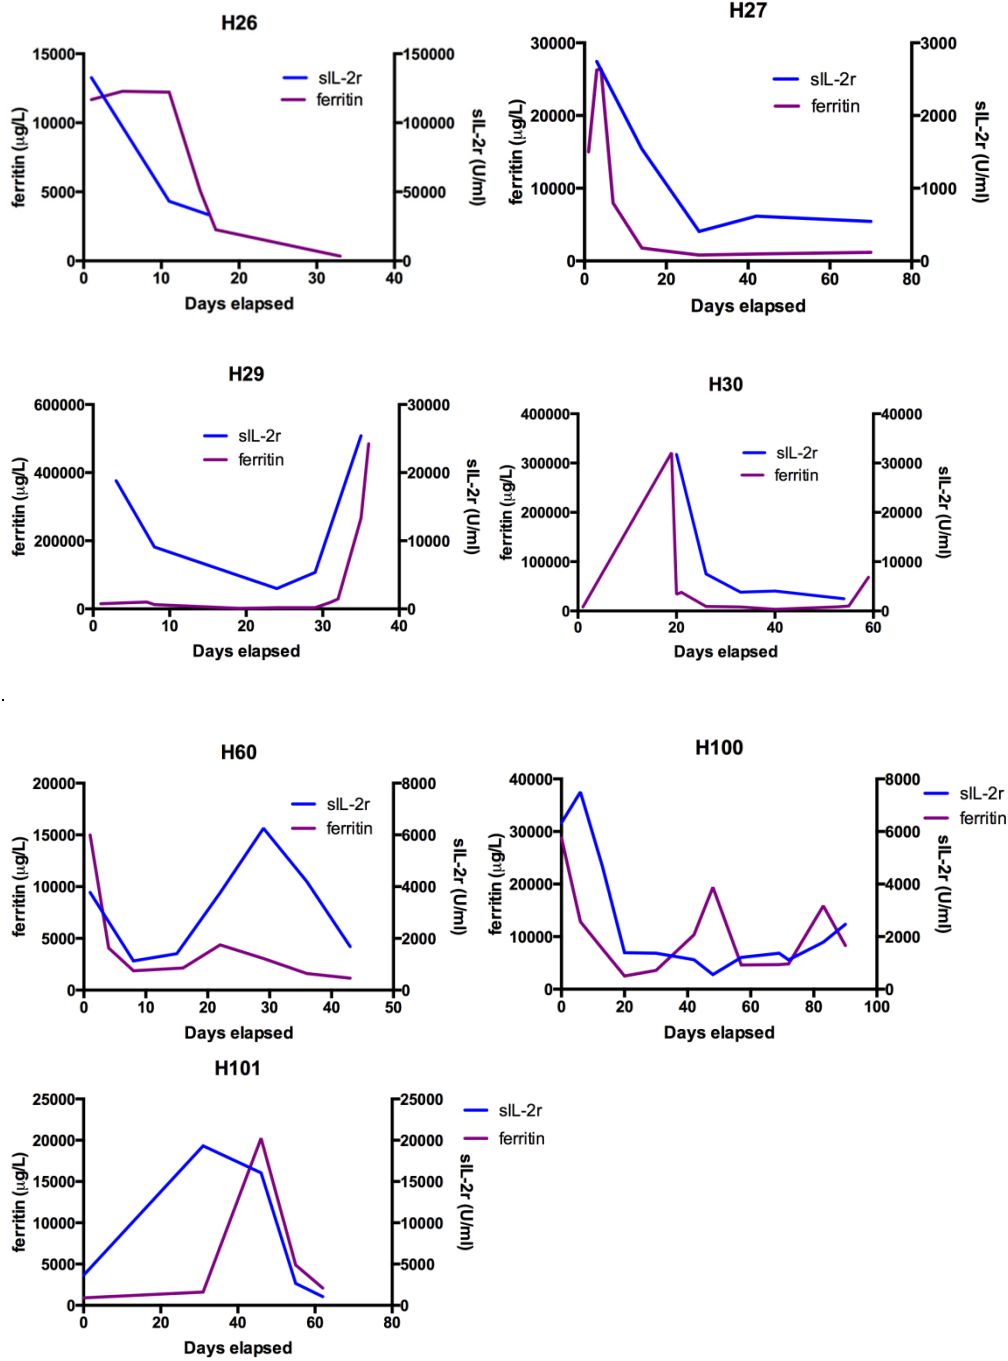

**Table 3: HLH subtypes breakdown**

|         | N  | %   | sIL2r<br>mean | SD      | ferritin<br>mean | ferritin<br>SD | sIL2r/ferritin<br>ratio mean |
|---------|----|-----|---------------|---------|------------------|----------------|------------------------------|
| IAHS    | 14 | 37% | 9720.6        | 9081.9  | 78154.9          | 143048.7       | 0.50                         |
| MAHS    | 16 | 42% | 20241.6       | 16991.8 | 58715.8          | 84460.9        | 1.41                         |
| MAS     | 3  | 8%  | 5007.7        | 1692.9  | 32728.7          | 1692.9         | 0.21                         |
| Unknown | 5  | 13% | 8788.2        | 3889.2  | 28982.0          | 27628.0        | 0.59                         |
